# Supplementary material for: The High-Throughput In Vitro CometChip Assay for the Analysis of Metal Oxide Nanomaterial Induced DNA Damage
Source: Nanomaterials (Basel). 2022 May 27;12(11):1844. doi: 10.3390/nano12111844 (PMC9181865; doi:10.3390/nano12111844)
Supplement: Supplementary file 1 [file nanomaterials-12-01844-s001.zip › Supplementary Data File 1.xlsx]

## Sheet: Settings
BMR = 1.0 (100%)
Trimmed samples so standardized residuals are < 3

## Sheet: CuO SA544868 2Hr
Press enter key to continue ... >
response: Response
ANALYSIS WITH EXPONENTIAL MODELS
model converged npar loglik aic
full model 1 7 13.7 -13.4
null model 1 2 -16.09 36.18
Expon. m3- 1 4 12.66 -17.32
warning: lower constraint on parameter cc has been increased to 2.02
due to value of CES
This might result in suboptimal fit of model 15
Expon. m5- 1 5 13.5 -17
------------------------------------------------------
selected model: Expon. m3-
estimate for var- : 0.01434
estimate for a- : 4.444
estimate for CED- : 12.65
estimate for d- : 0.6537
------------------------------------------------------
The Grubb outlier for this sample size is: 2.6516
1 outliers detected, with values for x and y:
50 17.2075
ATTENTION: 12 outliers detected
calculating confidence intervals ....
the CED (in orig. units) and the 90 % confidence interval is:
12.65
9.13
16.7
response: Response
ANALYSIS WITH HILL MODELS
model converged npar loglik aic
Hill m3- 1 4 12.71 -17.42
warning: lower constraint on parameter cc has been increased to 2.02
due to value of CES
This might result in suboptimal fit of model 25
Hill m5- 1 5 13.54 -17.08
------------------------------------------------------
selected model: Hill m3-
estimate for var- : 0.01427
estimate for a- : 4.448
estimate for CED- : 12.65
estimate for d- : 0.6623
------------------------------------------------------
The Grubb outlier for this sample size is: 2.6516
1 outliers detected, with values for x and y:
50 17.2075
ATTENTION: 12 outliers detected
calculating confidence intervals ....
the CED (in orig. units) and the 90 % confidence interval is:
12.65
9.16
16.7
----------- CES = 1 ---------------------------------
The lowest BMDL and highest BMDU from the fitted models are:
covar.txt bmdl.lowest bmdu.highest
1 all 9.13 16.7
---------------------------------------------------
calculations started at: Thu Jan 27 08:20:28 2022
and ended at: Thu Jan 27 08:20:29 2022
--------------------------- The analysis is complete. --------------------------

## Sheet: ZnO US3580 2 Hr
click in this window to see current output
Press enter key to continue ... >
response: Response
ANALYSIS WITH EXPONENTIAL MODELS
model converged npar loglik aic
full model 1 7 11.55 -9.1
null model 1 2 -14.1 32.2
Expon. m3- 1 4 11.06 -14.12
warning: lower constraint on parameter cc has been increased to 2.02
due to value of CES
This might result in suboptimal fit of model 15
Expon. m5- 1 5 11.03 -12.06
------------------------------------------------------
selected model: Expon. m3-
estimate for var- : 0.02042
estimate for a- : 4.837
estimate for CED- : 23.69
estimate for d- : 1.207
------------------------------------------------------
The Grubb outlier for this sample size is: 2.73378
No outliers detected
ATTENTION: 14 outliers detected
calculating confidence intervals ....
the CED (in orig. units) and the 90 % confidence interval is:
23.69
18.9
28.2
response: Response
ANALYSIS WITH HILL MODELS
model converged npar loglik aic
Hill m3- 1 4 11.04 -14.08
warning: lower constraint on parameter cc has been increased to 2.02
due to value of CES
This might result in suboptimal fit of model 25
Hill m5- 1 5 10.98 -11.96
------------------------------------------------------
selected model: Hill m3-
estimate for var- : 0.02045
estimate for a- : 4.841
estimate for CED- : 23.7
estimate for d- : 1.219
------------------------------------------------------
The Grubb outlier for this sample size is: 2.73378
No outliers detected
ATTENTION: 14 outliers detected
calculating confidence intervals ....
the CED (in orig. units) and the 90 % confidence interval is:
23.7
18.9
28.2
----------- CES = 1 ---------------------------------
The lowest BMDL and highest BMDU from the fitted models are:
covar.txt bmdl.lowest bmdu.highest
1 all 18.9 28.2
---------------------------------------------------
calculations started at: Thu Jan 27 08:24:57 2022
and ended at: Thu Jan 27 08:24:58 2022
--------------------------- The analysis is complete. --------------------------
ATTENTION: first select a single model when plotting residuals

## Sheet: ZnO US1003M 2 Hr
Press enter key to continue ... >
response: Response
ANALYSIS WITH EXPONENTIAL MODELS
model converged npar loglik aic
full model 1 7 13.42 -12.84
null model 1 2 -7.52 19.04
Expon. m3- 1 4 12.87 -17.74
warning: lower constraint on parameter cc has been increased to 2.02
due to value of CES
This might result in suboptimal fit of model 15
Expon. m5- 1 5 12.98 -15.96
------------------------------------------------------
selected model: Expon. m3-
estimate for var- : 0.01402
estimate for a- : 4.75
estimate for CED- : 33.49
estimate for d- : 1.857
------------------------------------------------------
The Grubb outlier for this sample size is: 2.6516
No outliers detected
ATTENTION: 16 outliers detected
calculating confidence intervals ....
the CED (in orig. units) and the 90 % confidence interval is:
33.49
29.9
36.5
response: Response
ANALYSIS WITH HILL MODELS
model converged npar loglik aic
Hill m3- 1 4 12.87 -17.74
warning: lower constraint on parameter cc has been increased to 2.02
due to value of CES
This might result in suboptimal fit of model 25
Hill m5- 1 5 12.98 -15.96
------------------------------------------------------
selected model: Hill m3-
estimate for var- : 0.01401
estimate for a- : 4.751
estimate for CED- : 33.48
estimate for d- : 1.87
------------------------------------------------------
The Grubb outlier for this sample size is: 2.6516
No outliers detected
ATTENTION: 16 outliers detected
calculating confidence intervals ....
the CED (in orig. units) and the 90 % confidence interval is:
33.48
29.9
36.5
----------- CES = 1 ---------------------------------
The lowest BMDL and highest BMDU from the fitted models are:
covar.txt bmdl.lowest bmdu.highest
1 all 29.9 36.5
---------------------------------------------------
calculations started at: Thu Jan 27 10:13:51 2022
and ended at: Thu Jan 27 10:13:52 2022
--------------------------- The analysis is complete. --------------------------

## Sheet: ZnCl2 2Hr
click in this window to see current output
Press enter key to continue ... >
response: Response
ANALYSIS WITH EXPONENTIAL MODELS
model converged npar loglik aic
full model 1 7 5.23 3.54
null model 1 2 -3.31 10.62
Expon. m3- 1 4 3.89 0.22
warning: lower constraint on parameter cc has been increased to 2.02
due to value of CES
This might result in suboptimal fit of model 15
Expon. m5- 1 5 4.32 1.36
------------------------------------------------------
selected model: Expon. m3-
estimate for var- : 0.04112
estimate for a- : 4.037
estimate for CED- : 78.68
estimate for d- : 1.201
------------------------------------------------------
The Grubb outlier for this sample size is: 2.75773
No outliers detected
ATTENTION: 14 outliers detected
calculating confidence intervals ....
the CED (in orig. units) and the 90 % confidence interval is:
78.68
59.2
141
response: Response
ANALYSIS WITH HILL MODELS
model converged npar loglik aic
Hill m3- 1 4 3.89 0.22
warning: lower constraint on parameter cc has been increased to 2.02
due to value of CES
This might result in suboptimal fit of model 25
Hill m5- 1 5 4.54 0.92
------------------------------------------------------
selected model: Hill m3-
estimate for var- : 0.04111
estimate for a- : 4.038
estimate for CED- : 78.72
estimate for d- : 1.207
------------------------------------------------------
The Grubb outlier for this sample size is: 2.75773
No outliers detected
ATTENTION: 14 outliers detected
calculating confidence intervals ....
the CED (in orig. units) and the 90 % confidence interval is:
78.72
59.1
142
----------- CES = 1 ---------------------------------
The lowest BMDL and highest BMDU from the fitted models are:
covar.txt bmdl.lowest bmdu.highest
1 all 59.1 142
---------------------------------------------------
calculations started at: Thu Jan 27 08:29:43 2022
and ended at: Thu Jan 27 08:29:44 2022
--------------------------- The analysis is complete. --------------------------

## Sheet: TiO2 5423HT 2Hr
click in this window to see current output
Press enter key to continue ... >
response: Response
ANALYSIS WITH EXPONENTIAL MODELS
model converged npar loglik aic
full model 1 7 13.16 -12.32
null model 1 2 -4.04 12.08
Expon. m3- 1 4 12.05 -16.1
warning: lower constraint on parameter cc has been increased to 2.02
due to value of CES
This might result in suboptimal fit of model 15
Expon. m5- 1 5 12.25 -14.5
------------------------------------------------------
selected model: Expon. m3-
estimate for var- : 0.01534
estimate for a- : 4.386
estimate for CED- : 91.43
estimate for d- : 1.407
------------------------------------------------------
The Grubb outlier for this sample size is: 2.6516
No outliers detected
ATTENTION: 13 outliers detected
calculating confidence intervals ....
the CED (in orig. units) and the 90 % confidence interval is:
91.43
77.1
105
response: Response
ANALYSIS WITH HILL MODELS
model converged npar loglik aic
Hill m3- 1 4 12.05 -16.1
warning: lower constraint on parameter cc has been increased to 2.02
due to value of CES
This might result in suboptimal fit of model 25
Hill m5- 1 5 12.25 -14.5
------------------------------------------------------
selected model: Hill m3-
estimate for var- : 0.01534
estimate for a- : 4.387
estimate for CED- : 91.43
estimate for d- : 1.415
------------------------------------------------------
The Grubb outlier for this sample size is: 2.6516
No outliers detected
ATTENTION: 13 outliers detected
calculating confidence intervals ....
the CED (in orig. units) and the 90 % confidence interval is:
91.43
77.1
105
----------- CES = 1 ---------------------------------
The lowest BMDL and highest BMDU from the fitted models are:
covar.txt bmdl.lowest bmdu.highest
1 all 77.1 105
---------------------------------------------------
calculations started at: Thu Jan 27 08:37:20 2022
and ended at: Thu Jan 27 08:37:21 2022
--------------------------- The analysis is complete. --------------------------

## Sheet: TiO2 R050P 2Hr
click in this window to see current output
Press enter key to continue ... >
response: Response
ANALYSIS WITH EXPONENTIAL MODELS
model converged npar loglik aic
full model 1 7 13.82 -13.64
null model 1 2 1.13 1.74
Expon. m3- 1 4 11.96 -15.92
warning: lower constraint on parameter cc has been increased to 2.02
due to value of CES
This might result in suboptimal fit of model 15
Expon. m5- 1 5 11.95 -13.9
------------------------------------------------------
selected model: Expon. m3-
estimate for var- : 0.0216
estimate for a- : 4.635
estimate for CED- : 144.5
estimate for d- : 0.7011
------------------------------------------------------
The Grubb outlier for this sample size is: 2.80155
1 outliers detected, with values for x and y:
100 5.19
ATTENTION: 14 outliers detected
calculating confidence intervals ....
the CED (in orig. units) and the 90 % confidence interval is:
144.5
99
318
response: Response
ANALYSIS WITH HILL MODELS
model converged npar loglik aic
Hill m3- 1 4 11.96 -15.92
warning: lower constraint on parameter cc has been increased to 2.02
due to value of CES
This might result in suboptimal fit of model 25
Hill m5- 1 5 11.94 -13.88
------------------------------------------------------
selected model: Hill m3-
estimate for var- : 0.02161
estimate for a- : 4.636
estimate for CED- : 144.8
estimate for d- : 0.7042
------------------------------------------------------
The Grubb outlier for this sample size is: 2.80155
1 outliers detected, with values for x and y:
100 5.19
ATTENTION: 14 outliers detected
calculating confidence intervals ....
the CED (in orig. units) and the 90 % confidence interval is:
144.8
99.2
318
----------- CES = 1 ---------------------------------
The lowest BMDL and highest BMDU from the fitted models are:
covar.txt bmdl.lowest bmdu.highest
1 all 99 318
---------------------------------------------------
calculations started at: Thu Jan 27 08:40:51 2022
and ended at: Thu Jan 27 08:40:51 2022
--------------------------- The analysis is complete. --------------------------

## Sheet: Covariate 2Hr
Press enter key to continue ... >
There are 12 missing values in the y column
these rows are removed from the dataset
There are 12 missing values in the y column
these rows are removed from the dataset
response: Response
ANALYSIS WITH EXPONENTIAL MODELS
model converged npar loglik aic
full model 1 37 66.34 -58.68
full-v 1 42 70.87 -57.74
null model 1 2 -69.7 143.4
null model-a 1 7 -56.77 127.54
Expon. m3- 1 4 -47.18 102.36
Expon. m3-a 1 9 -7.46 32.92
Expon. m3-ab 1 14 50.98 -73.96
warning: lower constraint on parameter cc has been increased to 2.02
due to value of CES
This might result in suboptimal fit of model 15
Expon. m5-a 1 10 -0.69 21.38
warning: lower constraint on parameter cc has been increased to 2.02
due to value of CES
This might result in suboptimal fit of model 15
Expon. m5-ab 1 15 54.85 -79.7
---------------------------------------------------
Best model with covariates is: Expon. m5-ab
---------------------------------------------------
------------------------------------------------------
selected model: Expon. m5-ab
estimate for var- : 0.02365
estimate for a-5423HT : 4.352
estimate for a-CuO_NP : 4.934
estimate for a-R050P : 5.015
estimate for a-ZnCl2 : 4.084
estimate for a-ZnO_MP : 4.506
estimate for a-ZnO_NP : 4.858
estimate for CED-5423HT : 90.05
estimate for CED-CuO_NP : 15.66
estimate for CED-R050P : 132.5
estimate for CED-ZnCl2 : 79.06
estimate for CED-ZnO_MP : 30.9
estimate for CED-ZnO_NP : 22.26
estimate for c- : 5.17
estimate for d- : 1.496
------------------------------------------------------
The Grubb outlier for this sample size is: 3.44788
No outliers detected
ATTENTION: 71 outliers detected
calculating confidence intervals ....
the CED (in orig. units) and the 90 % confidence interval for group 5423HT is:
90.05
73.9
112
the CED (in orig. units) and the 90 % confidence interval for group CuO_NP is:
15.66
12.2
19.8
the CED (in orig. units) and the 90 % confidence interval for group R050P is:
132.5
107
176
the CED (in orig. units) and the 90 % confidence interval for group ZnCl2 is:
79.06
64.2
103
the CED (in orig. units) and the 90 % confidence interval for group ZnO_MP is:
30.9
25.9
37
the CED (in orig. units) and the 90 % confidence interval for group ZnO_NP is:
22.26
18.4
26.3
response: Response
ANALYSIS WITH HILL MODELS
model converged npar loglik aic
Hill m3-a 1 9 -7.4 32.8
Hill m3-ab 1 14 51.05 -74.1
warning: lower constraint on parameter cc has been increased to 2.02
due to value of CES
This might result in suboptimal fit of model 25
Hill m5-a 1 10 -1.25 22.5
warning: lower constraint on parameter cc has been increased to 2.02
due to value of CES
This might result in suboptimal fit of model 25
Hill m5-ab 1 15 54.41 -78.82
---------------------------------------------------
Best model with covariates is: Hill m5-ab
---------------------------------------------------
------------------------------------------------------
selected model: Hill m5-ab
estimate for var- : 0.02382
estimate for a-5423HT : 4.37
estimate for a-CuO_NP : 4.907
estimate for a-R050P : 5.038
estimate for a-ZnCl2 : 4.098
estimate for a-ZnO_MP : 4.537
estimate for a-ZnO_NP : 4.865
estimate for CED-5423HT : 90.35
estimate for CED-CuO_NP : 15.19
estimate for CED-R050P : 133.9
estimate for CED-ZnCl2 : 79.42
estimate for CED-ZnO_MP : 31.15
estimate for CED-ZnO_NP : 21.88
estimate for c- : 7.474
estimate for d- : 1.648
------------------------------------------------------
The Grubb outlier for this sample size is: 3.44788
No outliers detected
ATTENTION: 68 outliers detected
calculating confidence intervals ....
the CED (in orig. units) and the 90 % confidence interval for group 5423HT is:
90.35
73.5
113
the CED (in orig. units) and the 90 % confidence interval for group CuO_NP is:
15.19
11.4
19.9
the CED (in orig. units) and the 90 % confidence interval for group R050P is:
133.9
108
178
the CED (in orig. units) and the 90 % confidence interval for group ZnCl2 is:
79.42
64.2
104
the CED (in orig. units) and the 90 % confidence interval for group ZnO_MP is:
31.15
25.8
37.6
the CED (in orig. units) and the 90 % confidence interval for group ZnO_NP is:
21.88
17.9
26.1
----------- CES = 1 ---------------------------------
The lowest BMDL and highest BMDU from the fitted models are:
covar.txt bmdl.lowest bmdu.highest
1 CED-5423HT 73.5 113
2 CED-CuO_NP 11.4 19.9
3 CED-R050P 107 178
4 CED-ZnCl2 64.2 104
5 CED-ZnO_MP 25.8 37.6
6 CED-ZnO_NP 17.9 26.3
---------------------------------------------------
The colors in the plot relate to the following subgroups:
color mark subgroup
1 black upward triangle 5423HT--
2 red cross CuO_NP--
3 green diamond R050P--
4 dark blue downward triangle ZnCl2--
5 light blue cross-square ZnO_MP--
6 pink cross-plus ZnO_NP--
calculations started at: Fri Jan 28 08:23:06 2022
and ended at: Fri Jan 28 08:24:14 2022
--------------------------- The analysis is complete. --------------------------

## Sheet: CuO SA544868 4Hr
5 ug/mL removed due to outlier value (residual > 3 for hill model)
response: Response
ANALYSIS WITH EXPONENTIAL MODELS
model converged npar loglik aic
full model 1 6 28.03 -44.06
null model 1 2 -21.15 46.3
Expon. m3- 1 4 9.85 -11.7
warning: lower constraint on parameter cc has been increased to 2.02
due to value of CES
This might result in suboptimal fit of model 15
Expon. m5- 1 5 24.36 -38.72
------------------------------------------------------
selected model: Expon. m5-
estimate for var- : 0.002274
estimate for a- : 4.518
estimate for CED- : 3.95
estimate for c- : 16.04
estimate for d- : 0.8436
------------------------------------------------------
The Grubb outlier for this sample size is: 2.54831
No outliers detected
ATTENTION: 12 outliers detected
calculating confidence intervals ....
the CED (in orig. units) and the 90 % confidence interval is:
3.95
3.42
4.52
response: Response
ANALYSIS WITH HILL MODELS
model converged npar loglik aic
Hill m3- 1 4 10.16 -12.32
warning: lower constraint on parameter cc has been increased to 2.02
due to value of CES
This might result in suboptimal fit of model 25
Hill m5- 1 5 26.75 -43.5
------------------------------------------------------
selected model: Hill m5-
estimate for var- : 0.001654
estimate for a- : 4.57
estimate for CED- : 4.039
estimate for c- : 28.01
estimate for d- : 0.9851
------------------------------------------------------
The Grubb outlier for this sample size is: 2.54831
No outliers detected
ATTENTION: 14 outliers detected
calculating confidence intervals ....
the CED (in orig. units) and the 90 % confidence interval is:
4.039
3.56
4.55
----------- CES = 1 ---------------------------------
The lowest BMDL and highest BMDU from the fitted models are:
covar.txt bmdl.lowest bmdu.highest
1 all 3.42 4.55
---------------------------------------------------
calculations started at: Thu May 20 15:07:30 2021
and ended at: Thu May 20 15:07:31 2021
--------------------------- The analysis is complete. --------------------------

## Sheet: ZnO US3580 4Hr
Press enter key to continue ... >
response: Response
ANALYSIS WITH EXPONENTIAL MODELS
model converged npar loglik aic
full model 1 7 7.21 -0.42
null model 1 2 -30.36 64.72
Expon. m3- 1 4 -5.94 19.88
warning: lower constraint on parameter cc has been increased to 2.02
due to value of CES
This might result in suboptimal fit of model 15
Expon. m5- 1 5 4.41 1.18
------------------------------------------------------
selected model: Expon. m5-
estimate for var- : 0.03845
estimate for a- : 4.394
estimate for CED- : 8.323
estimate for c- : 11.57
estimate for d- : 2.086
------------------------------------------------------
The Grubb outlier for this sample size is: 2.73378
No outliers detected
ATTENTION: 11 outliers detected
calculating confidence intervals ....
the CED (in orig. units) and the 90 % confidence interval is:
8.323
6.94
9.77
response: Response
ANALYSIS WITH HILL MODELS
model converged npar loglik aic
Hill m3- 1 4 -5.8 19.6
warning: lower constraint on parameter cc has been increased to 2.02
due to value of CES
This might result in suboptimal fit of model 25
Hill m5- 1 5 6.1 -2.2
------------------------------------------------------
selected model: Hill m5-
estimate for var- : 0.03276
estimate for a- : 4.499
estimate for CED- : 8.477
estimate for c- : 12.38
estimate for d- : 3.019
------------------------------------------------------
The Grubb outlier for this sample size is: 2.73378
No outliers detected
ATTENTION: 13 outliers detected
calculating confidence intervals ....
the CED (in orig. units) and the 90 % confidence interval is:
8.477
7.32
9.6
----------- CES = 1 ---------------------------------
The lowest BMDL and highest BMDU from the fitted models are:
covar.txt bmdl.lowest bmdu.highest
1 all 6.94 9.77
---------------------------------------------------
calculations started at: Thu Jan 27 09:14:58 2022
and ended at: Thu Jan 27 09:14:59 2022
--------------------------- The analysis is complete. --------------------------

[truncated: 7 more sheets: ZnO US1003M 4Hr, ZnCl2 4Hr, TiO2 5422HT 4Hr, TiO2 5423HT 4Hr, TiO2 R050P 4Hr, 5422,5423,R050PCov4Hr, ZnONP,MP.ZnCl2 Covariate 4Hr]
