# Supplementary material for: The High-Throughput In Vitro CometChip Assay for the Analysis of Metal Oxide Nanomaterial Induced DNA Damage
Source: Nanomaterials (Basel). 2022 May 27;12(11):1844. doi: 10.3390/nano12111844 (PMC9181865; doi:10.3390/nano12111844)
Supplement: Supplementary file 1 [file nanomaterials-12-01844-s001.zip › Supplementary Data File 2.xlsx]

## Sheet: Settings
BMR = 1.0 (100%)
Trimmed samples so standardized residuals are < 3

## Sheet: Covariate 2Hr
Press enter key to continue ... >
There are 12 missing values in the y column
these rows are removed from the dataset
There are 12 missing values in the y column
these rows are removed from the dataset
response: Response
ANALYSIS WITH EXPONENTIAL MODELS
model converged npar loglik aic
full model 1 37 66.34 -58.68
full-v 1 42 70.87 -57.74
null model 1 2 -69.7 143.4
null model-a 1 7 -56.77 127.54
Expon. m3- 1 4 -34.99 77.98
Expon. m3-a 1 9 2.39 13.22
Expon. m3-ab 1 14 50.98 -73.96
warning: lower constraint on parameter cc has been increased to 2.02
due to value of CES
This might result in suboptimal fit of model 15
Expon. m5-a 1 10 8.05 3.9
warning: lower constraint on parameter cc has been increased to 2.02
due to value of CES
This might result in suboptimal fit of model 15
Expon. m5-ab 1 15 54.85 -79.7
---------------------------------------------------
Best model with covariates is: Expon. m5-ab
---------------------------------------------------
------------------------------------------------------
selected model: Expon. m5-ab
estimate for var- : 0.02365
estimate for a-5423HT : 4.352
estimate for a-CuO_NP : 4.934
estimate for a-R050P : 5.015
estimate for a-ZnCl2 : 4.084
estimate for a-ZnO_MP : 4.506
estimate for a-ZnO_NP : 4.858
estimate for CED-5423HT : 53.97
estimate for CED-CuO_NP : 12.9
estimate for CED-R050P : 79.4
estimate for CED-ZnCl2 : 37.93
estimate for CED-ZnO_MP : 24.83
estimate for CED-ZnO_NP : 17.89
estimate for c- : 5.17
estimate for d- : 1.496
------------------------------------------------------
The Grubb outlier for this sample size is: 3.44788
No outliers detected
ATTENTION: 71 outliers detected
calculating confidence intervals ....
the CED (in orig. units) and the 90 % confidence interval for group 5423HT is:
53.97
44.3
67
the CED (in orig. units) and the 90 % confidence interval for group CuO_NP is:
12.9
10.1
16.3
the CED (in orig. units) and the 90 % confidence interval for group R050P is:
79.4
64
106
the CED (in orig. units) and the 90 % confidence interval for group ZnCl2 is:
37.93
30.8
49.6
the CED (in orig. units) and the 90 % confidence interval for group ZnO_MP is:
24.83
20.8
29.7
the CED (in orig. units) and the 90 % confidence interval for group ZnO_NP is:
17.89
14.8
21.1
response: Response
ANALYSIS WITH HILL MODELS
model converged npar loglik aic
Hill m3-a 1 9 2.45 13.1
Hill m3-ab 1 14 51.05 -74.1
warning: lower constraint on parameter cc has been increased to 2.02
due to value of CES
This might result in suboptimal fit of model 25
Hill m5-a 1 10 6.91 6.18
warning: lower constraint on parameter cc has been increased to 2.02
due to value of CES
This might result in suboptimal fit of model 25
Hill m5-ab 1 15 54.41 -78.82
---------------------------------------------------
Best model with covariates is: Hill m5-ab
---------------------------------------------------
------------------------------------------------------
selected model: Hill m5-ab
estimate for var- : 0.02382
estimate for a-5423HT : 4.37
estimate for a-CuO_NP : 4.907
estimate for a-R050P : 5.038
estimate for a-ZnCl2 : 4.098
estimate for a-ZnO_MP : 4.537
estimate for a-ZnO_NP : 4.865
estimate for CED-5423HT : 54.15
estimate for CED-CuO_NP : 12.51
estimate for CED-R050P : 80.24
estimate for CED-ZnCl2 : 38.1
estimate for CED-ZnO_MP : 25.03
estimate for CED-ZnO_NP : 17.58
estimate for c- : 7.474
estimate for d- : 1.648
------------------------------------------------------
The Grubb outlier for this sample size is: 3.44788
No outliers detected
ATTENTION: 68 outliers detected
calculating confidence intervals ....
the CED (in orig. units) and the 90 % confidence interval for group 5423HT is:
54.15
44.1
67.7
the CED (in orig. units) and the 90 % confidence interval for group CuO_NP is:
12.51
9.4
16.4
the CED (in orig. units) and the 90 % confidence interval for group R050P is:
80.24
64.4
107
the CED (in orig. units) and the 90 % confidence interval for group ZnCl2 is:
38.1
30.8
49.8
the CED (in orig. units) and the 90 % confidence interval for group ZnO_MP is:
25.03
20.7
30.2
the CED (in orig. units) and the 90 % confidence interval for group ZnO_NP is:
17.58
14.4
21
----------- CES = 1 ---------------------------------
The lowest BMDL and highest BMDU from the fitted models are:
covar.txt bmdl.lowest bmdu.highest
1 CED-5423HT 44.1 67.7
2 CED-CuO_NP 9.4 16.4
3 CED-R050P 64 107
4 CED-ZnCl2 30.8 49.8
5 CED-ZnO_MP 20.7 30.2
6 CED-ZnO_NP 14.4 21.1
---------------------------------------------------
The colors in the plot relate to the following subgroups:
color mark subgroup
1 black upward triangle 5423HT--
2 red cross CuO_NP--
3 green diamond R050P--
4 dark blue downward triangle ZnCl2--
5 light blue cross-square ZnO_MP--
6 pink cross-plus ZnO_NP--
calculations started at: Tue Feb 01 08:52:32 2022
and ended at: Tue Feb 01 08:53:40 2022
--------------------------- The analysis is complete. --------------------------

## Sheet: CuO SA544868 2 H
Press enter key to continue ... >
response: Response
ANALYSIS WITH EXPONENTIAL MODELS
model converged npar loglik aic
full model 1 7 13.7 -13.4
null model 1 2 -16.09 36.18
Expon. m3- 1 4 12.66 -17.32
warning: lower constraint on parameter cc has been increased to 2.02
due to value of CES
This might result in suboptimal fit of model 15
Expon. m5- 1 5 13.5 -17
------------------------------------------------------
selected model: Expon. m3-
estimate for var- : 0.01434
estimate for a- : 4.444
estimate for CED- : 10.42
estimate for d- : 0.6537
------------------------------------------------------
The Grubb outlier for this sample size is: 2.6516
1 outliers detected, with values for x and y:
41.20057829 17.2075
ATTENTION: 12 outliers detected
calculating confidence intervals ....
the CED (in orig. units) and the 90 % confidence interval is:
10.42
7.52
13.8
response: Response
ANALYSIS WITH HILL MODELS
model converged npar loglik aic
Hill m3- 1 4 12.71 -17.42
warning: lower constraint on parameter cc has been increased to 2.02
due to value of CES
This might result in suboptimal fit of model 25
Hill m5- 1 5 13.54 -17.08
------------------------------------------------------
selected model: Hill m3-
estimate for var- : 0.01427
estimate for a- : 4.448
estimate for CED- : 10.43
estimate for d- : 0.6623
------------------------------------------------------
The Grubb outlier for this sample size is: 2.6516
1 outliers detected, with values for x and y:
41.20057829 17.2075
ATTENTION: 12 outliers detected
calculating confidence intervals ....
the CED (in orig. units) and the 90 % confidence interval is:
10.43
7.55
13.7
----------- CES = 1 ---------------------------------
The lowest BMDL and highest BMDU from the fitted models are:
covar.txt bmdl.lowest bmdu.highest
1 all 7.52 13.8
---------------------------------------------------
calculations started at: Tue Feb 01 08:59:16 2022
and ended at: Tue Feb 01 08:59:17 2022
--------------------------- The analysis is complete. --------------------------

## Sheet: ZnO US3580 2H
click in this window to see current output
Press enter key to continue ... >
response: Response
ANALYSIS WITH EXPONENTIAL MODELS
model converged npar loglik aic
full model 1 7 11.55 -9.1
null model 1 2 -14.1 32.2
Expon. m3- 1 4 11.06 -14.12
warning: lower constraint on parameter cc has been increased to 2.02
due to value of CES
This might result in suboptimal fit of model 15
Expon. m5- 1 5 11.03 -12.06
------------------------------------------------------
selected model: Expon. m3-
estimate for var- : 0.02042
estimate for a- : 4.837
estimate for CED- : 19.04
estimate for d- : 1.207
------------------------------------------------------
The Grubb outlier for this sample size is: 2.73378
No outliers detected
ATTENTION: 14 outliers detected
calculating confidence intervals ....
the CED (in orig. units) and the 90 % confidence interval is:
19.04
15.1
22.6
response: Response
ANALYSIS WITH HILL MODELS
model converged npar loglik aic
Hill m3- 1 4 11.04 -14.08
warning: lower constraint on parameter cc has been increased to 2.02
due to value of CES
This might result in suboptimal fit of model 25
Hill m5- 1 5 10.98 -11.96
------------------------------------------------------
selected model: Hill m3-
estimate for var- : 0.02045
estimate for a- : 4.841
estimate for CED- : 19.04
estimate for d- : 1.219
------------------------------------------------------
The Grubb outlier for this sample size is: 2.73378
No outliers detected
ATTENTION: 14 outliers detected
calculating confidence intervals ....
the CED (in orig. units) and the 90 % confidence interval is:
19.04
15.1
22.6
----------- CES = 1 ---------------------------------
The lowest BMDL and highest BMDU from the fitted models are:
covar.txt bmdl.lowest bmdu.highest
1 all 15.1 22.6
---------------------------------------------------
calculations started at: Tue Feb 01 09:01:44 2022
and ended at: Tue Feb 01 09:01:45 2022
--------------------------- The analysis is complete. --------------------------

## Sheet: ZnO US1003M 2H
Press enter key to continue ... >
response: Response
ANALYSIS WITH EXPONENTIAL MODELS
model converged npar loglik aic
full model 1 7 13.42 -12.84
null model 1 2 -7.52 19.04
Expon. m3- 1 4 12.87 -17.74
warning: lower constraint on parameter cc has been increased to 2.02
due to value of CES
This might result in suboptimal fit of model 15
Expon. m5- 1 5 12.98 -15.96
------------------------------------------------------
selected model: Expon. m3-
estimate for var- : 0.01402
estimate for a- : 4.75
estimate for CED- : 26.91
estimate for d- : 1.857
------------------------------------------------------
The Grubb outlier for this sample size is: 2.6516
No outliers detected
ATTENTION: 16 outliers detected
calculating confidence intervals ....
the CED (in orig. units) and the 90 % confidence interval is:
26.91
24.1
29.4
response: Response
ANALYSIS WITH HILL MODELS
model converged npar loglik aic
Hill m3- 1 4 12.87 -17.74
warning: lower constraint on parameter cc has been increased to 2.02
due to value of CES
This might result in suboptimal fit of model 25
Hill m5- 1 5 12.98 -15.96
------------------------------------------------------
selected model: Hill m3-
estimate for var- : 0.01401
estimate for a- : 4.751
estimate for CED- : 26.9
estimate for d- : 1.87
------------------------------------------------------
The Grubb outlier for this sample size is: 2.6516
No outliers detected
ATTENTION: 16 outliers detected
calculating confidence intervals ....
the CED (in orig. units) and the 90 % confidence interval is:
26.9
24.1
29.4
----------- CES = 1 ---------------------------------
The lowest BMDL and highest BMDU from the fitted models are:
covar.txt bmdl.lowest bmdu.highest
1 all 24.1 29.4
---------------------------------------------------
calculations started at: Tue Feb 01 09:04:03 2022
and ended at: Tue Feb 01 09:04:04 2022
--------------------------- The analysis is complete. --------------------------

## Sheet: ZnCl2 2H
Press enter key to continue ... >
response: Response
ANALYSIS WITH EXPONENTIAL MODELS
model converged npar loglik aic
full model 1 7 5.23 3.54
null model 1 2 -3.31 10.62
Expon. m3- 1 4 3.89 0.22
warning: lower constraint on parameter cc has been increased to 2.02
due to value of CES
This might result in suboptimal fit of model 15
Expon. m5- 1 5 4.32 1.36
------------------------------------------------------
selected model: Expon. m3-
estimate for var- : 0.04112
estimate for a- : 4.037
estimate for CED- : 37.75
estimate for d- : 1.201
------------------------------------------------------
The Grubb outlier for this sample size is: 2.75773
No outliers detected
ATTENTION: 14 outliers detected
calculating confidence intervals ....
the CED (in orig. units) and the 90 % confidence interval is:
37.75
28.4
67.5
response: Response
ANALYSIS WITH HILL MODELS
model converged npar loglik aic
Hill m3- 1 4 3.89 0.22
warning: lower constraint on parameter cc has been increased to 2.02
due to value of CES
This might result in suboptimal fit of model 25
Hill m5- 1 5 4.54 0.92
------------------------------------------------------
selected model: Hill m3-
estimate for var- : 0.04111
estimate for a- : 4.038
estimate for CED- : 37.77
estimate for d- : 1.207
------------------------------------------------------
The Grubb outlier for this sample size is: 2.75773
No outliers detected
ATTENTION: 14 outliers detected
calculating confidence intervals ....
the CED (in orig. units) and the 90 % confidence interval is:
37.77
28.4
67.9
----------- CES = 1 ---------------------------------
The lowest BMDL and highest BMDU from the fitted models are:
covar.txt bmdl.lowest bmdu.highest
1 all 28.4 67.9
---------------------------------------------------
calculations started at: Tue Feb 01 09:06:51 2022
and ended at: Tue Feb 01 09:06:52 2022
--------------------------- The analysis is complete. --------------------------

## Sheet: TiO2 5423HT 2H
Press enter key to continue ... >
Attention: the factor you chose as covariate has only one level
response: Response
ANALYSIS WITH EXPONENTIAL MODELS
model converged npar loglik aic
full model 1 7 13.16 -12.32
null model 1 2 -4.04 12.08
Expon. m3- 1 4 12.05 -16.1
warning: lower constraint on parameter cc has been increased to 2.02
due to value of CES
This might result in suboptimal fit of model 15
Expon. m5- 1 5 12.25 -14.5
------------------------------------------------------
selected model: Expon. m3-
estimate for var- : 0.01534
estimate for a- : 4.386
estimate for CED- : 54.8
estimate for d- : 1.407
------------------------------------------------------
The Grubb outlier for this sample size is: 2.6516
No outliers detected
ATTENTION: 13 outliers detected
calculating confidence intervals ....
the CED (in orig. units) and the 90 % confidence interval is:
54.8
46.2
63.2
response: Response
ANALYSIS WITH HILL MODELS
model converged npar loglik aic
Hill m3- 1 4 12.05 -16.1
warning: lower constraint on parameter cc has been increased to 2.02
due to value of CES
This might result in suboptimal fit of model 25
Hill m5- 1 5 12.25 -14.5
------------------------------------------------------
selected model: Hill m3-
estimate for var- : 0.01534
estimate for a- : 4.387
estimate for CED- : 54.8
estimate for d- : 1.415
------------------------------------------------------
The Grubb outlier for this sample size is: 2.6516
No outliers detected
ATTENTION: 13 outliers detected
calculating confidence intervals ....
the CED (in orig. units) and the 90 % confidence interval is:
54.8
46.2
63.2
----------- CES = 1 ---------------------------------
The lowest BMDL and highest BMDU from the fitted models are:
covar.txt bmdl.lowest bmdu.highest
1 all 46.2 63.2
---------------------------------------------------
calculations started at: Tue Feb 01 09:09:24 2022
and ended at: Tue Feb 01 09:09:25 2022
--------------------------- The analysis is complete. --------------------------

## Sheet: TiO2 R050P 2H
Press enter key to continue ... >
response: Response
ANALYSIS WITH EXPONENTIAL MODELS
model converged npar loglik aic
full model 1 7 13.82 -13.64
null model 1 2 1.13 1.74
Expon. m3- 1 4 11.96 -15.92
warning: lower constraint on parameter cc has been increased to 2.02
due to value of CES
This might result in suboptimal fit of model 15
Expon. m5- 1 5 11.95 -13.9
------------------------------------------------------
selected model: Expon. m3-
estimate for var- : 0.0216
estimate for a- : 4.635
estimate for CED- : 86.6
estimate for d- : 0.7011
------------------------------------------------------
The Grubb outlier for this sample size is: 2.80155
1 outliers detected, with values for x and y:
59.93413968 5.19
ATTENTION: 14 outliers detected
calculating confidence intervals ....
the CED (in orig. units) and the 90 % confidence interval is:
86.6
59.3
190
response: Response
ANALYSIS WITH HILL MODELS
model converged npar loglik aic
Hill m3- 1 4 11.96 -15.92
warning: lower constraint on parameter cc has been increased to 2.02
due to value of CES
This might result in suboptimal fit of model 25
Hill m5- 1 5 11.94 -13.88
------------------------------------------------------
selected model: Hill m3-
estimate for var- : 0.02161
estimate for a- : 4.636
estimate for CED- : 86.77
estimate for d- : 0.7042
------------------------------------------------------
The Grubb outlier for this sample size is: 2.80155
1 outliers detected, with values for x and y:
59.93413968 5.19
ATTENTION: 14 outliers detected
calculating confidence intervals ....
the CED (in orig. units) and the 90 % confidence interval is:
86.77
59.4
191
----------- CES = 1 ---------------------------------
The lowest BMDL and highest BMDU from the fitted models are:
covar.txt bmdl.lowest bmdu.highest
1 all 59.3 191
---------------------------------------------------
calculations started at: Tue Feb 01 09:11:57 2022
and ended at: Tue Feb 01 09:11:58 2022
--------------------------- The analysis is complete. --------------------------

## Sheet: Zn Covariate 4H
Press enter key to continue ... >
There are 71 missing values in the y column
these rows are removed from the dataset
There are 71 missing values in the y column
these rows are removed from the dataset
response: Response
ANALYSIS WITH EXPONENTIAL MODELS
model converged npar loglik aic
full model 1 19 20.42 -2.84
full-v 1 21 20.52 0.96
null model 1 2 -83.72 171.44
null model-a 1 4 -81.39 170.78
Expon. m3- 1 4 -30.76 69.52
Expon. m3-a 1 6 -16.53 45.06
Expon. m3-ab 1 8 -12.89 41.78
warning: lower constraint on parameter cc has been increased to 2.02
due to value of CES
This might result in suboptimal fit of model 15
Expon. m5-a 1 7 0.93 12.14
warning: lower constraint on parameter cc has been increased to 2.02
due to value of CES
This might result in suboptimal fit of model 15
Expon. m5-ab 1 9 7.35 3.3
---------------------------------------------------
Best model with covariates is: Expon. m5-ab
---------------------------------------------------
------------------------------------------------------
selected model: Expon. m5-ab
estimate for var- : 0.04583
estimate for a-ZnCl2 : 3.801
estimate for a-ZnO_MP : 4.462
estimate for a-ZnO_NP : 4.515
estimate for CED-ZnCl2 : 11.96
estimate for CED-ZnO_MP : 8.488
estimate for CED-ZnO_NP : 6.623
estimate for c- : 10.96
estimate for d- : 1.958
------------------------------------------------------
The Grubb outlier for this sample size is: 3.19966
No outliers detected
ATTENTION: 29 outliers detected
calculating confidence intervals ....
the CED (in orig. units) and the 90 % confidence interval for group ZnCl2 is:
11.96
9.83
14.2
the CED (in orig. units) and the 90 % confidence interval for group ZnO_MP is:
8.488
7.12
10
the CED (in orig. units) and the 90 % confidence interval for group ZnO_NP is:
6.623
5.57
7.85
response: Response
ANALYSIS WITH HILL MODELS
model converged npar loglik aic
Hill m3-a 1 6 -16.24 44.48
Hill m3-ab 1 8 -12.51 41.02
warning: lower constraint on parameter cc has been increased to 2.02
due to value of CES
This might result in suboptimal fit of model 25
Hill m5-a 1 7 2.77 8.46
warning: lower constraint on parameter cc has been increased to 2.02
due to value of CES
This might result in suboptimal fit of model 25
Hill m5-ab 1 9 10.94 -3.88
---------------------------------------------------
Best model with covariates is: Hill m5-ab
---------------------------------------------------
------------------------------------------------------
selected model: Hill m5-ab
estimate for var- : 0.04066
estimate for a-ZnCl2 : 3.852
estimate for a-ZnO_MP : 4.719
estimate for a-ZnO_NP : 4.615
estimate for CED-ZnCl2 : 11.97
estimate for CED-ZnO_MP : 8.944
estimate for CED-ZnO_NP : 6.733
estimate for c- : 12.01
estimate for d- : 2.764
------------------------------------------------------
The Grubb outlier for this sample size is: 3.19966
No outliers detected
ATTENTION: 28 outliers detected
calculating confidence intervals ....
the CED (in orig. units) and the 90 % confidence interval for group ZnCl2 is:
11.97
10.1
13.9
the CED (in orig. units) and the 90 % confidence interval for group ZnO_MP is:
8.944
7.63
10.3
the CED (in orig. units) and the 90 % confidence interval for group ZnO_NP is:
6.733
5.79
7.74
----------- CES = 1 ---------------------------------
The lowest BMDL and highest BMDU from the fitted models are:
covar.txt bmdl.lowest bmdu.highest
1 CED-ZnCl2 9.83 14.2
2 CED-ZnO_MP 7.12 10.3
3 CED-ZnO_NP 5.57 7.85
---------------------------------------------------
The colors in the plot relate to the following subgroups:
color mark subgroup
1 black upward triangle ZnCl2--
2 red cross ZnO_MP--
3 green diamond ZnO_NP--
calculations started at: Tue Feb 01 09:19:03 2022
and ended at: Tue Feb 01 09:19:14 2022
--------------------------- The analysis is complete. --------------------------

## Sheet: TiO2 Covariate 4H
Press enter key to continue ... >
response: Response
ANALYSIS WITH EXPONENTIAL MODELS
model converged npar loglik aic
full model 1 17 30.31 -26.62
full-v 1 19 31.38 -24.76
null model 1 2 -10.36 24.72
null model-a 1 4 -8.96 25.92
Expon. m3- 1 4 16.92 -25.84
Expon. m3-a 1 6 23.05 -34.1
Expon. m3-b 1 6 22.35 -32.7
Expon. m3-ab 1 8 24.16 -32.32
warning: lower constraint on parameter cc has been increased to 2.02
due to value of CES
This might result in suboptimal fit of model 15
Expon. m5- 1 5 17.37 -24.74
warning: lower constraint on parameter cc has been increased to 2.02
due to value of CES
This might result in suboptimal fit of model 15
Expon. m5-a 1 7 23.85 -33.7
warning: lower constraint on parameter cc has been increased to 2.02
due to value of CES
This might result in suboptimal fit of model 15
Expon. m5-b 1 7 23.47 -32.94
warning: lower constraint on parameter cc has been increased to 2.02
due to value of CES
This might result in suboptimal fit of model 15
Expon. m5-ab 1 9 24.27 -30.54
---------------------------------------------------
Best model with covariates is: Expon. m3-a
However Expon. m5-a is a reasonable model as well
and so is Expon. m5-b
and so is Expon. m3-b
and so is Expon. m3-ab
---------------------------------------------------
------------------------------------------------------
selected model: Expon. m3-a
estimate for var- : 0.02454
estimate for a-5422HT : 3.929
estimate for a-5423HT : 3.837
estimate for a-R050P : 4.551
estimate for CED- : 54.84
estimate for d- : 0.5926
------------------------------------------------------
The Grubb outlier for this sample size is: 3.15143
No outliers detected
ATTENTION: 34 outliers detected
calculating confidence intervals ....
the CED (in orig. units) and the 90 % confidence interval is:
54.84
42.2
72.3
response: Response
ANALYSIS WITH HILL MODELS
model converged npar loglik aic
Hill m3- 1 4 16.93 -25.86
Hill m3-a 1 6 23.06 -34.12
Hill m3-b 1 6 22.36 -32.72
Hill m3-ab 1 8 24.16 -32.32
warning: lower constraint on parameter cc has been increased to 2.02
due to value of CES
This might result in suboptimal fit of model 25
Hill m5- 1 5 17.46 -24.92
warning: lower constraint on parameter cc has been increased to 2.02
due to value of CES
This might result in suboptimal fit of model 25
Hill m5-a 1 7 24.03 -34.06
warning: lower constraint on parameter cc has been increased to 2.02
due to value of CES
This might result in suboptimal fit of model 25
Hill m5-b 1 7 23.61 -33.22
warning: lower constraint on parameter cc has been increased to 2.02
due to value of CES
This might result in suboptimal fit of model 25
Hill m5-ab 1 9 25.56 -33.12
---------------------------------------------------
Best model with covariates is: Hill m3-a
However Hill m5-a is a reasonable model as well
and so is Hill m5-b
and so is Hill m5-ab
and so is Hill m3-b
---------------------------------------------------
------------------------------------------------------
selected model: Hill m3-a
estimate for var- : 0.02453
estimate for a-5422HT : 3.929
estimate for a-5423HT : 3.837
estimate for a-R050P : 4.551
estimate for CED- : 54.83
estimate for d- : 0.596
------------------------------------------------------
The Grubb outlier for this sample size is: 3.15143
No outliers detected
ATTENTION: 35 outliers detected
calculating confidence intervals ....
the CED (in orig. units) and the 90 % confidence interval is:
54.83
42.2
72.4
----------- CES = 1 ---------------------------------
The lowest BMDL and highest BMDU from the fitted models are:
covar.txt bmdl.lowest bmdu.highest
1 all 42.2 72.4
---------------------------------------------------
The colors in the plot relate to the following subgroups:
color mark subgroup
1 black upward triangle 5422HT--
2 red cross 5423HT--
3 green diamond R050P--
calculations started at: Tue Feb 01 09:22:56 2022
and ended at: Tue Feb 01 09:22:59 2022
--------------------------- The analysis is complete. --------------------------

[truncated: 7 more sheets: CuO SA544868 4H, ZnO US3580 4H, ZnO US1003M 4H, ZnCl2 4H, TiO2 5422HT 4H, TiO2 5423HT 4H, TiO2 R050P 4H]
